# Supplementary material for: Emergence of Dengue Virus Serotype 2 Cosmopolitan Genotype, Colombia
Source: PubMed Central journal article supplement (PMC10756373; doi:10.3201/eid3001.230972), 2024-01
Supplement: 23-0972-Techapp-s1.pdf [file 23-0972-Techapp-s1.pdf]

Article DOI: <https://doi.org/10.3201/eid3001.230972>

*EID cannot ensure accessibility for supplementary materials supplied by authors. Readers who have difficulty accessing supplementary content should contact the authors for assistance.*

# Emergence of Dengue Virus Serotype 2 Cosmopolitan Genotype, Colombia

## Appendix

### Materials and Methods

#### Ethics Statement

The Technical Research Committee and Ethics Research Board from Universidad del Rosario in Bogotá, Colombia approved the protocol implemented in this study DVO005 1585-CV142: “Vigilancia molecular de Enfermedades transmitidas por vectores ETVs y enfermedades emergentes en la región de la Orinoquía.”

#### Sample Collection, Viral RNA Isolation, and PCR identification

Serum samples were collected of patients from the department of Meta, Colombia and sent to the microbiology laboratory at Universidad del Rosario, Bogotá-Colombia for processing. Viral RNA was extracted using the Quick-RNA Viral Kit (ZYMO RESEARCH, <https://zymoresearch.eu>), and a traditional PCR (Polymerase Chain Reaction) test was performed for identification of dengue virus (DENV) serotypes using the previously described protocol (1), confirming the infection with DENV-2 serotype.

#### Library Preparation and Whole-Genome Sequencing

Retro transcription was performed from the genetic material to generate cDNA (complementary DNA) using the LunaScript RT SuperMix Reverse transcription Kit enzyme (NEB #E3010). Then, cDNA was used to conduct a multiplex PCR using DENV-2 sequencing primers (2) was conducted by using Q5 High Fidelity Hot-Start DNA Polymerase (New England Biolabs, <https://www.neb.com>) . The amplified products were sequenced by ONT (Oxford Nanopore Technology), for which barcode ligation (assigning one barcode per sample) was

initially performed using the ONT Barcode Kit (EXP-NBD196). Subsequently, the library was constructed by joining the amplicons in equal volumes (with their barcode ligated) and proceeded to adaptor ligation using the ONT ligation sequencing kit (SQK.LSK109). The constructed library was sequenced in ONT MinION using R.9.4 flow cells and MinKnow V.3.1.4 software, getting  $\approx 500,000$  reads per sample. The bioinformatics analysis was performed on the raw Fast5 files, using Super Accuracy base-calling (SUP) ( $Q > 10$ ) to obtain the Fastq files and then demultiplexed with the Guppy V3.1.5 tool (3).

### **Generation of Consensus Sequences and Phylogenetic Analysis**

The generated reads were initially mapped against the DENV-2 reference genome (NC\_001474) available in the National Center for Biotechnology Information (NCBI) database to obtain consensus sequences using Minimap2 V.2.24 (4). Subsequently, an assembly correction was performed using the Fast5 files and Fastq files obtained from the assembly, using Nanopolish V.0.8.4 tool. A phylogenetic reconstruction was generated on the two sequences obtained previously and reference sequences obtained from GenBank (Table). Sequence alignment was initially carried out using MAFFT V.5 (5). With this alignment, a Maximum Likelihood (ML) tree was constructed in iQtree tool version 1.6.12 (6) using the substitution model GTR+F+G4 (Model chosen according to the BIC generated by ModelFinder included in the IQ tree tool version 1.6.12). Node support was performed using 1,000 iterations by the Ultrafast Bootstrap (UFBoot) approach and visualized in iTOL We inferred time-scaled trees by using TreeTime (7) which considers a fixed clock rate of  $8 \times 10^{-3}$ , a strict clock (SC) under a coalescent tree skyline prior and a root step to minimize residuals in a root-to-tip.

### **References**

1. Chien LJ, Liao TL, Shu PY, Huang JH, Gubler DJ, Chang GJJ. Development of real-time reverse transcriptase PCR assays to detect and serotype dengue viruses. *J Clin Microbiol.* 2006;44:1295–304. **PMID 16597854**
2. Stubbs SCB, Blacklaws BA, Yohan B, Yudhaputri FA, Hayati RF, Schwem B, et al. Assessment of a multiplex PCR and Nanopore-based method for dengue virus sequencing in Indonesia. *Virology.* 2020;17:24. **PMID 32054488**
3. Wick RR, Judd LM, Holt KE. Performance of neural network basecalling tools for Oxford Nanopore sequencing. *Genome Biol.* 2019;20:129. **PMID 31234903**

4. Li H. Minimap2: pairwise alignment for nucleotide sequences. *Bioinformatics*. 2018;34:3094–100.

**PMID 29750242**

5. Katoh K, Kuma K, Toh H, Miyata T. MAFFT version 5: improvement in accuracy of multiple sequence alignment. *Nucleic Acids Res*. 2005;33:511–8. [PubMed](#)

<https://doi.org/10.1093/nar/gki198>

6. Nguyen LT, Schmidt HA, von Haeseler A, Minh BQ. IQ-TREE: a fast and effective stochastic algorithm for estimating maximum-likelihood phylogenies. *Mol Biol Evol*. 2015;32:268–74.

**PMID 25371430**

7. Sagulenko P, Puller V, Neher RA. TreeTime: Maximum-likelihood phylodynamic analysis. *Virus Evol*. 2018;4:vex042. **PMID 29340210**

**Appendix Table 1.** Sequencing statistics of the genomes obtained in this research.

| Acc Number | Number of Reads | Genome Coverage | Coverage Depth* | Mean read length | Mean read quality |
|------------|-----------------|-----------------|-----------------|------------------|-------------------|
| OR619404   | 9,451           | 92.2%           | 120X            | 137              | 13.9              |
| OR619405   | 3,843           | 92%             | 47X             | 133              | 13.7              |

\*Depth coverage was calculated with the following formula: (Number of Reads \* Mean read length)/(Reference genome length). Reference genome length: 10,723.

**Appendix Table 2.** List of accession numbers, locations, collection date for dengue virus serotype 2 cosmopolitan genotypes obtained from GenBank.

| Accession no. | Location                         | Collection date | Accession | Location  | Collection date |
|---------------|----------------------------------|-----------------|-----------|-----------|-----------------|
| MW481671      | Angola                           | 2018–7–9        | KR779782  | Singapore | 2007–4–8        |
| MZ130520      | Democratic Republic of the Congo | 2016–4–11       | MW512342  | Singapore | 2007–1–10       |
| MZ130521      | Democratic Republic of the Congo | 2016–6–20       | JN851120  | Singapore | 2007–12–29      |
| MW191701      | India                            | 2017–7–1        | MW512350  | Singapore | 2008–1–8        |
| MW191700      | India                            | 2017–7–1        | JN851122  | Singapore | 2008–7–29       |
| ON231305      | Senegal                          | 2018–10–29      | MW512347  | Singapore | 2007–1–1        |
| MZ130526      | Tanzania                         | 2014–5–21       | MW512348  | Singapore | 2007–9–13       |
| MZ130522      | Egypt                            | 2017–11–7       | MW946584  | Thailand  | 2007–11–15      |
| MZ130528      | Djibouti                         | 2018–6–24       | KY586700  | Thailand  | 2009–12–31      |
| MZ130527      | France                           | 2019–1–5        | JN851119  | Singapore | 2008–4–8        |
| MZ130519      | Mozambique                       | 2019–3–5        | GQ398265  | Singapore | 2008–1–1        |
| MZ130518      | France                           | 2019–5–14       | GQ398266  | Singapore | 2007–12–31      |
| MZ130524      | Benin                            | 2019–7–9        | MW512354  | Singapore | 2009–1–1        |
| MZ130525      | Cameroon                         | 2019–12–29      | MW512355  | Singapore | 2009–11–24      |
| OR025669      | Brazil                           | 2023–3–27       | KM279609  | Singapore | 2009–1–29       |
| OR025670      | Brazil                           | 2023–3–27       | KM279610  | Singapore | 2010–5–31       |
| MW946478      | India                            | 1974–1–1        | KM279596  | Singapore | 2012–10–26      |
| FJ882602      | Sri Lanka                        | 1996–1–1        | KM279518  | Singapore | 2011–6–15       |
| MG560143      | India                            | 2014–1–1        | KM279528  | Singapore | 2012–1–1        |
| MG721056      | India                            | 2016–1–1        | KM279519  | Singapore | 2011–8–20       |
| MW512470      | Singapore                        | 2017–12–31      | KM279566  | Singapore | 2012–4–4        |
| OM639983      | India                            | 2021–11–16      | KM279577  | Singapore | 2012–9–11       |
| OM639986      | India                            | 2021–11–16      | KM279580  | Singapore | 2013–1–1        |
| OM648092      | India                            | 2021–10–20      | KX380823  | Singapore | 2012–12–31      |
| OM681318      | India                            | 2021–11–16      | KM279573  | Singapore | 2012–10–7       |
| KY427084      | India                            | 2010–9–1        | KX380825  | Singapore | 2013–1–1        |
| MH822949      | India                            | 2014–10–28      | KX380837  | Singapore | 2013–3–17       |
| MK473384      | Kenya                            | 2016–5–4        | KR779786  | Singapore | 2013–12–31      |
| MK473386      | Kenya                            | 2016–5–4        | KX380816  | Singapore | 2012–12–31      |
| MG779195      | Kenya                            | 2017–1–1        | KX380827  | Singapore | 2013–1–1        |
| MK473385      | Kenya                            | 2016–5–10       | KM279522  | Singapore | 2011–5–20       |

| Accession no. | Location    | Collection date | Accession | Location  | Collection date |
|---------------|-------------|-----------------|-----------|-----------|-----------------|
| MN577554      | Kenya       | 2017-6-30       | KM279513  | Singapore | 2011-7-21       |
| MN335246      | Kenya       | 2017-6-7        | KM279514  | Singapore | 2011-7-21       |
| MN335244      | Kenya       | 2017-5-29       | KM279581  | Singapore | 2011-7-1        |
| MN335247      | Kenya       | 2017-4-10       | KM279523  | Singapore | 2011-8-18       |
| MG779196      | Kenya       | 2017-1-7        | KM279526  | Singapore | 2011-7-1        |
| MG779201      | Kenya       | 2017-1-1        | KM279563  | Singapore | 2012-6-20       |
| MG779197      | Kenya       | 2017-3-18       | MW512383  | Singapore | 2013-7-3        |
| MG779203      | Kenya       | 2017-1-11       | MW512382  | Singapore | 2013-2-5        |
| MG779198      | Kenya       | 2017-1-1        | KX380831  | Singapore | 2013-4-10       |
| MN577556      | Kenya       | 2017-7-31       | KM279539  | Singapore | 2012-5-12       |
| MN577553      | Kenya       | 2017-6-30       | KM279537  | Singapore | 2012-7-9        |
| MN577555      | Kenya       | 2017-7-1        | KM279587  | Singapore | 2012-6-9        |
| MZ857209      | Kenya       | 2013-1-1        | KM279592  | Singapore | 2012-12-9       |
| MH456899      | Kenya       | 2014-6-11       | KM279549  | Singapore | 2012-10-4       |
| MH456898      | Kenya       | 2014-6-23       | KM279591  | Singapore | 2012-10-4       |
| MH456897      | Kenya       | 2014-7-9        | MK578532  | China     | 2016-4-1        |
| MH456892      | Kenya       | 2014-10-17      | MW512448  | Singapore | 2015-1-12       |
| MH456893      | Kenya       | 2014-11-25      | MW512466  | Singapore | 2016-1-1        |
| MH456894      | Kenya       | 2014-6-20       | OQ028230  | Vietnam   | 2020-9-7        |
| MH456895      | Kenya       | 2014-7-4        | MN982899  | Australia | 2019-5-1        |
| MN577559      | Kenya       | 2013-4-1        | OQ028232  | Vietnam   | 2020-3-2        |
| MN577560      | Kenya       | 2013-5-16       | OQ832621  | Vietnam   | 2019-12-1       |
| MN577561      | Kenya       | 2013-5-16       | OQ832624  | Vietnam   | 2020-9-1        |
| MN577557      | Kenya       | 2017-7-1        | OQ832625  | Vietnam   | 2020-9-30       |
| MN577552      | Kenya       | 2014-2-28       | KU666946  | Malaysia  | 2014-2-28       |
| MN577551      | Kenya       | 2013-4-30       | MW512430  | Singapore | 2014-12-31      |
| MN577563      | Kenya       | 2013-5-31       | KX380830  | Singapore | 2013-10-25      |
| MN577565      | Kenya       | 2014-1-31       | KX380835  | Singapore | 2013-1-8        |
| MN577558      | Kenya       | 2017-7-31       | MW512406  | Singapore | 2013-12-31      |
| LC367234      |             | 2009-10-8       | MW512407  | Singapore | 2013-1-1        |
| MW512372      | Singapore   | 2012-8-9        | KX380809  | Singapore | 2012-1-1        |
| OP310806      | India       | 2018-10-30      | KX380822  | Singapore | 2012-12-31      |
| MH891770      | India       | 2018-4-23       | KX380832  | Singapore | 2013-1-1        |
| MK858109      | India       | 2016-9-11       | KX380810  | Singapore | 2012-12-31      |
| MK858116      | India       | 2017-9-6        | KX380838  | Singapore | 2013-1-1        |
| ON123649      | India       | 2020-9-23       | MW512404  | Singapore | 2013-12-17      |
| OM639989      | India       | 2021-11-16      | MN952966  | China     | 2015-11-1       |
| OM639987      | India       | 2021-11-16      | MW512464  | Singapore | 2016-1-12       |
| OM639988      | India       | 2021-11-16      | MH827525  | China     | 2017-1-1        |
| MK858102      | India       | 2016-10-13      | MN018357  | China     | 2014-5-28       |
| OP310807      | India       | 2019-9-26       | MN923112  | China     | 2019-8-26       |
| MG721054      | India       | 2016-1-1        | OM349569  | China     | 2019-9-25       |
| MK858100      | India       | 2016-8-10       | OM368351  | China     | 2019-9-16       |
| MK858104      | India       | 2016-10-5       | ON890422  | China     | 2019-9-16       |
| MG592698      | India       | 2016-12-31      | ON908229  | China     | 2019-9-16       |
| MK858099      | India       | 2016-8-26       | MH827539  | China     | 2017-1-1        |
| MK858106      | India       | 2016-10-20      | MN018353  | China     | 2016-6-15       |
| JX475906      | India       | 2009-1-1        | MW512465  | Singapore | 2016-6-12       |
| MG560144      | India       | 2014-12-31      | MW730832  | Nepal     | 2017-7-1        |
| LC121816      |             | 2016-1-31       | MW730816  | Nepal     | 2017-7-22       |
| MH822950      | India       | 2013-8-19       | MW730815  | Nepal     | 2017-7-1        |
| MH822951      | India       | 2013-9-4        | MW730822  | Nepal     | 2017-7-1        |
| MH822952      | India       | 2014-9-16       | MW730826  | Nepal     | 2017-7-31       |
| MW512449      | Singapore   | 2016-12-31      | MW730828  | Nepal     | 2017-7-31       |
| LC436670      | Bangladesh  | 2017-10-1       | MW730829  | Nepal     | 2017-7-31       |
| LC436671      | Bangladesh  | 2017-10-1       | JN851123  | Singapore | 2004-1-1        |
| MW730836      | Nepal       | 2017-7-31       | JN851126  | Singapore | 2005-12-31      |
| MW730837      | Nepal       | 2017-7-1        | HM488257  | Guam      | 2001-4-19       |
| MW730838      | Nepal       | 2017-7-31       | JF327392  | Singapore | 2009-1-1        |
| MH822953      | India       | 2015-9-9        | KC762669  | Indonesia | 2007-7-17       |
| MH822956      | India       | 2013-9-9        | MW512368  | Singapore | 2011-1-1        |
| MH822955      | India       | 2014-10-25      | KU509268  | Indonesia | 2009-12-31      |
| MK858096      | India       | 2014-11-10      | MW512366  | Singapore | 2011-12-31      |
| MH822954      | India       | 2015-8-31       | MW512402  | Singapore | 2013-1-1        |
| MK629885      | South Korea | 2015-11-1       | MH048672  | Malaysia  | 2014-12-1       |
| MW481692      | Angola      | 2018-6-1        | KC131142  | China     | 2012-9-1        |
| MW481676      | Angola      | 2018-4-4        | MW512401  | Singapore | 2013-12-31      |
| MW481677      | Angola      | 2018-3-31       | MN018356  | China     | 2014-9-23       |
| MW481679      | Angola      | 2018-4-7        | MW721472  | China     | 2014-10-1       |

| Accession no. | Location     | Collection date | Accession | Location  | Collection date |
|---------------|--------------|-----------------|-----------|-----------|-----------------|
| MW481680      | Angola       | 2018-5-7        | MW512447  | Singapore | 2015-12-31      |
| MW481674      | Angola       | 2018-4-16       | MW512463  | Singapore | 2016-1-1        |
| MW481673      | Angola       | 2018-4-22       | MK411558  | Indonesia | 2016-2-20       |
| MK564488      | China        | 2018-3-9        | MK411559  | Indonesia | 2016-2-23       |
| MW481682      | Angola       | 2018-4-24       | OP984834  | Vietnam   | 2022-11-20      |
| MW481686      | Angola       | 2018-4-17       | MN923116  | China     | 2019-6-30       |
| MK578533      | China        | 2018-8-16       | OR125606  | China     | 2023-5-6        |
| MK783207      | China        | 2018-4-23       | OR136164  | Indonesia | 2023-5-9        |
| MK783206      | China        | 2018-8-19       | MW512416  | Singapore | 2014-1-1        |
| MK783210      | China        | 2018-12-31      | MW512452  | Singapore | 2016-1-1        |
| MK783209      | China        | 2018-12-31      | MW512435  | Singapore | 2015-1-1        |
| MW481685      | Angola       | 2018-4-7        | MN018337  | China     | 2015-6-20       |
| MW481691      | Angola       | 2018-5-13       | KX621246  | China     | 2015-2-4        |
| MW481688      | Angola       | 2018-4-17       | KX621247  | China     | 2015-1-1        |
| MW481687      | Angola       | 2018-5-14       | MK783190  | China     | 2018-12-31      |
| MW481694      | Angola       | 2018-5-17       | MW721460  | China     | 2018-10-1       |
| MH460898      | Angola       | 2018-1-18       | MK564479  | China     | 2016-8-23       |
| MW481675      | Angola       | 2018-3-12       | MH827540  | China     | 2017-1-1        |
| MW481689      | Angola       | 2018-5-15       | MN018340  | China     | 2016-7-7        |
| MW481693      | Angola       | 2018-5-20       | MN018348  | China     | 2016-7-18       |
| MW481684      | Angola       | 2018-3-31       | MH827543  | China     | 2017-1-1        |
| MW481670      | Angola       | 2019-2-15       | MN018347  | China     | 2016-10-10      |
| MW481690      | Angola       | 2018-3-31       | MW721469  | China     | 2017-10-1       |
| JQ922551      | India        | 2005-12-31      | MW721471  | China     | 2014-10-31      |
| AF359579      |              | 1999-1-1        | MK783201  | China     | 2018-12-17      |
| KF041236      | Pakistan     | 2008-1-1        | MW721461  | China     | 2018-10-1       |
| JQ955623      | India        | 2009-1-1        | OQ426773  | Vietnam   | 2018-10-22      |
| JQ922549      | India        | 1996-11-13      | OQ426757  | Vietnam   | 2018-10-15      |
| MZ857219      | Somalia      | 1996-12-31      | OM730078  | India     | 2021-11-16      |
| GQ252676      | Sri Lanka    | 2003-8-28       | OP921001  | India     | 2022-7-27       |
| GQ252677      | Sri Lanka    | 2004-1-1        | OP921000  | India     | 2022-7-29       |
| KF360005      | Pakistan     | 2010-11-1       | OM680963  | India     | 2021-11-16      |
| KF041233      | Pakistan     | 2011-1-1        | OM639993  | India     | 2021-11-16      |
| KF041237      | Pakistan     | 2009-1-1        | OM639980  | India     | 2021-11-16      |
| KJ830750      | Saudi Arabia | 2014-1-13       | OM700180  | India     | 2021-11-16      |
| KF041235      | Pakistan     | 2009-1-1        | OQ821481  | India     | 2022-7-1        |
| KJ010186      | Pakistan     | 2013-10-2       | OQ821482  | India     | 2022-8-19       |
| KF041232      | Pakistan     | 2011-1-16       | OM639981  | India     | 2021-9-2        |
| KF041234      | Pakistan     | 2011-1-16       | OM639982  | India     | 2021-9-14       |
| KJ010185      | Pakistan     | 2011-10-20      | OM639992  | India     | 2021-11-16      |
| KM217156      | Pakistan     | 2011-8-27       | OM639984  | India     | 2021-11-16      |
| KM217157      | Pakistan     | 2011-8-27       | OP809582  | India     | 2021-12-31      |
| KM217158      | Pakistan     | 2013-8-23       | OP389112  | China     | 2022-7-25       |
| KJ701507      | Pakistan     | 2013-8-27       | MW512451  | Singapore | 2016-1-1        |
| DQ448231      | India        | 2001-1-1        | LC410189  | Thailand  | 2016-10-1       |
| FJ898454      | India        | 2006-1-1        | LC410190  | Thailand  | 2016-10-1       |
| KU509271      | India        | 2006-12-18      | LC410191  | Thailand  | 2017-2-1        |
| JQ955624      | India        | 2011-6-7        | MK783192  | China     | 2018-6-8        |
| OP310808      | India        | 2019-9-27       | MK564484  | China     | 2018-7-23       |
| ON123652      | India        | 2020-2-28       | MK783191  | China     | 2018-12-31      |
| OP809581      | India        | 2021-1-1        | MK783199  | China     | 2018-6-5        |
| OM639991      | India        | 2021-11-16      | MK783196  | China     | 2018-1-1        |
| OM639990      | India        | 2021-11-16      | MK783197  | China     | 2018-7-12       |
| OM698821      | India        | 2021-11-16      | MK783198  | China     | 2018-12-31      |
| MZ857222      | Djibouti     | 2007-12-30      | MK783194  | China     | 2018-2-4        |
| MZ857218      | Eritrea      | 2017-1-8        | MK783193  | China     | 2018-4-1        |
| MZ857221      | Uganda       | 2017-1-8        | MK783195  | China     | 2018-4-1        |
| MH822939      | India        | 2012-11-8       | OP684209  | China     | 2019-10-12      |
| MW512412      | Singapore    | 2014-1-1        | OP684199  | China     | 2019-7-31       |
| MH891768      | India        | 2016-10-26      | OP684210  | China     | 2019-10-15      |
| MH822940      | India        | 2014-12-31      | MT754369  | China     | 2019-10-24      |
| MH822941      | India        | 2013-8-30       | MT754367  | China     | 2019-10-24      |
| KY427085      | India        | 2011-1-3        | MZ453008  | China     | 2019-12-31      |
| MN294937      | Saudi Arabia | 2016-2-2        | MZ453010  | China     | 2019-1-1        |
| KF479233      | China        | 2013-1-4        | MZ453009  | China     | 2019-8-31       |
| MH822944      | India        | 2012-10-8       | MZ453011  | China     | 2019-12-31      |
| MW512413      | Singapore    | 2014-2-22       | MZ636804  | Thailand  | 2019-11-30      |
| MH822943      | India        | 2014-11-7       | OR029723  | China     | 2019-8-17       |
| MH822946      | India        | 2012-10-19      | OR029721  | China     | 2019-8-16       |

| Accession no. | Location    | Collection date | Accession | Location   | Collection date |
|---------------|-------------|-----------------|-----------|------------|-----------------|
| MH822945      | India       | 2012-10-19      | OR029732  | China      | 2019-8-21       |
| MK858097      | India       | 2013-1-1        | OR029722  | China      | 2019-8-17       |
| MH822947      | India       | 2012-9-24       | OR029728  | China      | 2019-8-20       |
| MH822948      | India       | 2012-11-20      | OR029730  | China      | 2019-8-20       |
| MW191698      | India       | 2016-7-1        | ON888666  | China      | 2019-8-16       |
| KX380829      | Singapore   | 2013-12-31      | OR029720  | China      | 2019-8-16       |
| MW191699      | India       | 2016-7-31       | MW720952  | China      | 2019-9-1        |
| MN253134      | India       | 2017-10-30      | MW512387  | Singapore  | 2013-1-1        |
| MK858105      | India       | 2016-10-5       | LC436669  | Bangladesh | 2017-10-1       |
| MK858112      | India       | 2017-10-5       | LC436674  | Bangladesh | 2017-11-1       |
| OM700181      | India       | 2021-11-16      | LC436673  | Bangladesh | 2017-11-1       |
| OM639985      | India       | 2021-11-16      | MN328061  | Bangladesh | 2019-7-29       |
| ON123663      | India       | 2018-9-17       | ON123639  | Peru       | 2021-3-4        |
| ON109598      | India       | 2021-1-1        | ON123644  | Peru       | 2021-7-21       |
| ON799267      | India       | 2018-12-28      | ON123640  | Peru       | 2021-3-8        |
| MG721057      | India       | 2016-1-1        | ON123638  | Peru       | 2021-3-1        |
| MW512468      | Singapore   | 2017-12-31      | ON123641  | Peru       | 2021-3-24       |
| MG721058      | India       | 2016-12-31      | OR150734  | Brazil     | 2023-1-24       |
| MK858111      | India       | 2016-9-8        | OR150740  | Brazil     | 2023-2-13       |
| MG721055      | India       | 2016-1-26       | OR150737  | Brazil     | 2023-2-7        |
| MK858107      | India       | 2016-10-19      | OR150733  | Brazil     | 2023-1-29       |
| MN272405      | Seychelles  | 2016-5-7        | OR150736  | Brazil     | 2023-2-7        |
| MN272404      | France      | 2018-3-31       | OR150741  | Brazil     | 2023-1-13       |
| MK858101      | India       | 2016-8-10       | OR150732  | Brazil     | 2023-1-27       |
| MK858103      | India       | 2016-10-13      | OR150712  | Brazil     | 2023-4-5        |
| MG721062      | India       | 2016-11-26      | OR150709  | Brazil     | 2023-1-17       |
| MK858110      | India       | 2016-9-8        | OR150705  | Brazil     | 2023-2-14       |
| MK858098      | India       | 2016-8-31       | OR150711  | Brazil     | 2023-3-27       |
| MK858108      | India       | 2016-10-5       | OR150706  | Brazil     | 2023-2-26       |
| OQ339137      | India       | 2022-1-1        | OP941844  | Brazil     | 2022-11-6       |
| OQ733364      | India       | 2022-1-1        | OP941839  | Brazil     | 2022-10-24      |
| OQ733363      | India       | 2022-1-22       | OP941840  | Brazil     | 2022-10-24      |
| OQ547234      | India       | 2022-11-7       | OP941842  | Brazil     | 2022-10-18      |
| ON123651      | India       | 2020-10-22      | OP941836  | Brazil     | 2022-11-1       |
| OP310805      | India       | 2020-10-14      | OP941838  | Brazil     | 2022-10-19      |
| OQ733365      | India       | 2022-1-1        | OP941837  | Brazil     | 2022-11-3       |
| MH822942      | India       | 2014-9-22       | OR138993  | Brazil     | 2022-4-21       |
| MW387614      | China       | 2009-1-31       | OR150727  | Brazil     | 2023-2-19       |
| MN018339      | China       | 2014-6-20       | OR150718  | Brazil     | 2023-2-18       |
| MN720746      | France      | 2014-8-25       | OR150721  | Brazil     | 2023-2-16       |
| MW512469      | Singapore   | 2017-10-10      | OR138998  | Brazil     | 2021-7-14       |
| OP410991      | Singapore   | 2017-10-1       | OR150708  | Brazil     | 2023-1-17       |
| MN018358      | China       | 2016-2-1        | OR150739  | Brazil     | 2023-2-13       |
| MK629886      | South Korea | 2015-1-1        | OR150735  | Brazil     | 2023-2-5        |
| MK578531      | China       | 2016-2-4        | OR150738  | Brazil     | 2023-2-10       |
| MH110583      | China       | 2017-9-1        | OR025672  | Brazil     | 2023-3-5        |
| OP684160      | China       | 2017-8-30       | OR025675  | Brazil     | 2023-3-16       |
| OP684169      | China       | 2017-9-3        | OR025600  | Brazil     | 2023-3-23       |
| MH110589      | China       | 2017-9-1        | ON634750  | Brazil     | 2022-3-24       |
| MH110585      | China       | 2017-9-1        | ON634756  | Brazil     | 2022-1-30       |
| OP684161      | China       | 2017-8-31       | ON634742  | Brazil     | 2022-2-5        |
| MH110575      | China       | 2017-8-1        | OR150729  | Brazil     | 2023-2-13       |
| OP684154      | China       | 2017-8-28       | OR150730  | Brazil     | 2023-2-13       |
| MF156247      | China       | 2015-10-28      | OR039513  | Brazil     | 2022-4-1        |
| MF156248      | China       | 2015-10-28      | OR150726  | Brazil     | 2023-2-2        |
| MF156236      | China       | 2015-10-7       | OR150717  | Brazil     | 2023-1-27       |
| MF156237      | China       | 2015-10-18      | OR150722  | Brazil     | 2023-2-19       |
| MF156238      | China       | 2015-10-18      | OR150725  | Brazil     | 2023-1-25       |
| MF156243      | China       | 2015-10-28      | OR150723  | Brazil     | 2023-2-10       |
| MF156245      | China       | 2015-10-28      | OR150720  | Brazil     | 2023-4-10       |
| MF156246      | China       | 2015-10-28      | OR150719  | Brazil     | 2023-2-17       |
| MF156242      | China       | 2015-10-26      | OR138984  | Brazil     | 2022-4-15       |
| MF156244      | China       | 2015-10-28      | OR138989  | Brazil     | 2022-4-12       |
| KY937186      | China       | 2015-12-31      | OR138990  | Brazil     | 2022-4-19       |
| KY937188      | China       | 2015-12-31      | OR138992  | Brazil     | 2022-4-13       |
| KY672951      | China       | 2015-11-13      | OR039516  | Brazil     | 2022-4-18       |
| KY672953      | China       | 2015-7-20       | OR039505  | Brazil     | 2022-4-1        |
| MF940251      | China       | 2015-1-1        | OR039502  | Brazil     | 2022-4-1        |
| MF940252      | China       | 2015-3-20       | OR039500  | Brazil     | 2022-3-28       |

| Accession no. | Location      | Collection date | Accession | Location    | Collection date |
|---------------|---------------|-----------------|-----------|-------------|-----------------|
| MF940236      | China         | 2015-2-14       | OR039507  | Brazil      | 2022-4-13       |
| KY672950      | China         | 2015-9-28       | OR039496  | Brazil      | 2022-3-24       |
| MF940239      | China         | 2015-2-13       | OR039497  | Brazil      | 2022-3-28       |
| MF940242      | China         | 2015-1-1        | OR039508  | Brazil      | 2022-4-22       |
| MF940246      | China         | 2015-2-12       | OR039499  | Brazil      | 2022-3-30       |
| MF940237      | China         | 2015-7-7        | OR039501  | Brazil      | 2022-4-1        |
| MF940243      | China         | 2015-6-22       | OR039503  | Brazil      | 2022-4-2        |
| MF940241      | China         | 2015-10-18      | OR039504  | Brazil      | 2022-4-2        |
| MF940238      | China         | 2015-10-30      | KX452021  | Malaysia    | 2014-1-1        |
| MF940253      | China         | 2015-12-31      | KX452022  | Malaysia    | 2014-1-1        |
| GQ398258      | Indonesia     | 1975-1-1        | KX452034  | Malaysia    | 2014-1-31       |
| GQ398259      | Indonesia     | 1976-5-7        | MH488959  | Malaysia    | 2014-1-1        |
| GQ398262      | Indonesia     | 1976-1-1        | KX452040  | Malaysia    | 2014-1-31       |
| GQ398260      | Indonesia     | 1976-3-31       | KX452041  | Malaysia    | 2014-1-1        |
| GQ398261      | Indonesia     | 1976-12-11      | MH827536  | China       | 2017-1-1        |
| MN577562      | Kenya         | 2013-5-31       | MN018346  | China       | 2016-2-11       |
| MN577564      | Kenya         | 2014-6-1        | KU666947  | Malaysia    | 2014-2-1        |
| EU056810      | Burkina Faso  | 1983-1-1        | KX452026  | Malaysia    | 2014-1-1        |
| GU131843      | Burkina Faso  | 1986-12-31      | KU517847  | Philippines | 2015-8-3        |
| OM317565      | Cameroon      | 2020-6-24       | KX372564  | Australia   | 2015-3-22       |
| OM317566      | Cameroon      | 2020-8-2        | MW512390  | Singapore   | 2013-1-1        |
| MT982126      | Burkina Faso  | 2019-8-10       | KX452032  | Malaysia    | 2014-1-31       |
| MT982148      | Burkina Faso  | 2019-9-8        | KX452017  | Malaysia    | 2014-1-31       |
| KY627762      | Burkina Faso  | 2016-11-5       | MH110573  | China       | 2017-8-1        |
| KY627763      | Burkina Faso  | 2016-11-21      | OP684152  | China       | 2017-7-2        |
| MT261965      | Burkina Faso  | 2017-10-23      | MW512398  | Singapore   | 2013-1-1        |
| MT261966      | Burkina Faso  | 2017-11-8       | KU666944  | Malaysia    | 2014-1-1        |
| OL469513      | Cote D Ivoire | 2017-5-4        | MW512453  | Singapore   | 2016-1-1        |
| MT261958      | Burkina Faso  | 2017-10-16      | MW512394  | Singapore   | 2013-1-1        |
| MT261963      | Burkina Faso  | 2017-10-25      | KX452024  | Malaysia    | 2014-1-1        |
| MT261957      | Burkina Faso  | 2017-10-16      | KX452027  | Malaysia    | 2014-1-31       |
| MT261959      | Burkina Faso  | 2017-10-17      | KX452045  | Malaysia    | 2014-1-1        |
| LC666719      | Ghana         | 2017-2-20       | KX452023  | Malaysia    | 2014-1-31       |
| LC666718      | Ghana         | 2017-9-2        | MW512436  | Singapore   | 2015-1-1        |
| MW288030      | Senegal       | 2018-10-29      | MW512420  | Singapore   | 2014-4-22       |
| MW288029      | Senegal       | 2018-10-1       | MW512422  | Singapore   | 2014-1-1        |
| MW288024      | Senegal       | 2018-10-1       | MW512426  | Singapore   | 2014-10-27      |
| ON231312      | Senegal       | 2018-11-8       | MW512437  | Singapore   | 2015-1-1        |
| ON231311      | Senegal       | 2018-11-9       | MW512455  | Singapore   | 2016-12-31      |
| ON231313      | Senegal       | 2018-11-9       | MW512424  | Singapore   | 2014-7-30       |
| MT982169      | Cote D Ivoire | 2017-6-6        | MK629884  | South Korea | 2015-9-19       |
| MT261964      | Burkina Faso  | 2017-10-24      | KY921905  | Singapore   | 2015-3-1        |
| MT261969      | Burkina Faso  | 2017-10-30      | MK513444  | Singapore   | 2015-1-30       |
| MT261961      | Burkina Faso  | 2017-10-26      | MW512438  | Singapore   | 2015-3-13       |
| MT261971      | Burkina Faso  | 2017-11-6       | MW512446  | Singapore   | 2015-6-14       |
| ON885286      | Niger         | 2019-6-15       | MF314189  | Singapore   | 2016-1-11       |
| ON907580      | Niger         | 2019-6-15       | MW512441  | Singapore   | 2015-5-4        |
| ON908223      | Niger         | 2019-6-15       | MW512442  | Singapore   | 2015-4-22       |
| MT261962      | Burkina Faso  | 2017-10-25      | MW512478  | Singapore   | 2017-1-26       |
| MZ857220      | Burkina Faso  | 2017-9-20       | MW512439  | Singapore   | 2015-10-17      |
| MT261967      | Burkina Faso  | 2017-10-9       | MW512440  | Singapore   | 2015-9-12       |
| MT982731      | Burkina Faso  | 2016-11-2       | MW512456  | Singapore   | 2016-4-23       |
| MT980927      | Mauritania    | 2017-11-30      | MW512457  | Singapore   | 2016-1-19       |
| MT981148      | Senegal       | 2019-1-4        | MW512458  | Singapore   | 2016-10-5       |
| ON231310      | Senegal       | 2018-10-31      | MW512459  | Singapore   | 2016-1-1        |
| ON231309      | Senegal       | 2018-10-28      | MW512444  | Singapore   | 2015-6-14       |
| MT981011      | Senegal       | 2018-10-15      | MW512461  | Singapore   | 2016-11-24      |
| OK384579      | Mauritania    | 2018-10-13      | MW512443  | Singapore   | 2015-5-30       |
| ON231306      | Senegal       | 2018-10-28      | KU948303  | Singapore   | 2016-2-23       |
| ON231308      | Senegal       | 2018-10-28      | MW512460  | Singapore   | 2016-9-21       |
| ON231307      | Senegal       | 2018-10-28      | MW512445  | Singapore   | 2015-12-31      |
| GQ398263      | Indonesia     | 1975-12-31      | MW512462  | Singapore   | 2016-1-25       |
| GQ398264      | Indonesia     | 1976-3-7        | MK564483  | China       | 2017-8-11       |
| OK469352      | Singapore     | 1993-12-31      | MH827551  | China       | 2017-1-1        |
| KU666945      | Malaysia      | 2014-1-31       | OP895917  | Maldives    | 2021-12-31      |
| MW512467      | Singapore     | 2016-1-1        | OP684186  | China       | 2018-5-28       |
| JN851131      | Singapore     | 2005-1-1        | OP684195  | China       | 2018-6-20       |
| FJ196852      | China         | 2001-10-26      | MT006163  | Sri Lanka   | 2018-7-10       |
| KC964093      | China         | 2001-10-26      | MT006137  | Sri Lanka   | 2017-10-23      |

| Accession no. | Location      | Collection date | Accession | Location  | Collection date |
|---------------|---------------|-----------------|-----------|-----------|-----------------|
| KU509269      | Philippines   | 2009-11-23      | MT006146  | Sri Lanka | 2017-11-2       |
| KU509275      | Philippines   | 2008-7-15       | MT006138  | Sri Lanka | 2017-10-25      |
| MT832071      | Philippines   | 2013-3-13       | MT006136  | Sri Lanka | 2017-10-13      |
| MT832072      | Philippines   | 2013-3-13       | MT006144  | Sri Lanka | 2018-4-30       |
| MT832055      | Philippines   | 2013-10-11      | MT006157  | Sri Lanka | 2017-11-21      |
| MT832056      | Philippines   | 2013-10-11      | MT006161  | Sri Lanka | 2017-12-13      |
| MT832062      | Philippines   | 2013-1-1        | MT006174  | Sri Lanka | 2018-1-22       |
| MW512432      | Singapore     | 2014-12-31      | MT006155  | Sri Lanka | 2017-11-21      |
| MT832057      | Philippines   | 2015-9-29       | MT006170  | Sri Lanka | 2018-1-8        |
| MT832058      | Philippines   | 2015-9-29       | MT006159  | Sri Lanka | 2017-11-24      |
| MN944002      | China         | 2019-7-2        | MT180479  | Sri Lanka | 2017-8-1        |
| MW512489      | Singapore     | 2018-12-31      | MW512477  | Singapore | 2017-1-1        |
| MT832080      | Philippines   | 2013-5-25       | MN577548  | Sri Lanka | 2017-7-31       |
| MT832065      | Philippines   | 2014-1-11       | MN577546  | Sri Lanka | 2017-8-9        |
| MT832066      | Philippines   | 2014-7-14       | MN577549  | Sri Lanka | 2017-8-9        |
| MT832053      | Philippines   | 2014-7-23       | MH827548  | China     | 2017-4-23       |
| MT832054      | Philippines   | 2014-7-23       | MT006175  | Sri Lanka | 2018-1-30       |
| MK783205      | China         | 2018-12-31      | OM978278  | Sri Lanka | 2020-2-5        |
| MT832064      | Philippines   | 2013-12-13      | OQ102952  | Sri Lanka | 2022-5-9        |
| MT832077      | Philippines   | 2013-3-17       | OQ102945  | Sri Lanka | 2021-11-19      |
| MW881533      | China         | 2021-2-2        | OQ102949  | Sri Lanka | 2022-2-15       |
| MT832059      | Philippines   | 2014-12-31      | OQ102944  | Sri Lanka | 2021-11-23      |
| MT832069      | Philippines   | 2013-1-1        | OQ102946  | Sri Lanka | 2021-12-1       |
| MH827542      | China         | 2017-1-1        | MT006139  | Sri Lanka | 2017-10-31      |
| MN018350      | China         | 2016-6-29       | MT006140  | Sri Lanka | 2017-10-31      |
| MW512433      | Singapore     | 2014-1-1        | MT006153  | Sri Lanka | 2017-11-12      |
| MH827545      | China         | 2017-1-1        | MT006173  | Sri Lanka | 2018-1-22       |
| MN018364      | China         | 2016-8-12       | MT006180  | Sri Lanka | 2018-3-28       |
| OM368352      | China         | 2018-5-17       | MT006142  | Sri Lanka | 2018-4-22       |
| ON875316      | China         | 2018-5-17       | MT006176  | Sri Lanka | 2018-2-14       |
| ON908222      | China         | 2018-5-17       | MT006186  | Sri Lanka | 2018-4-9        |
| MN566109      | New Caledonia | 2017-4-1        | MT006171  | Sri Lanka | 2018-1-19       |
| MN566110      | New Caledonia | 2017-6-18       | MT006181  | Sri Lanka | 2018-3-29       |
| MH985859      | Australia     | 2017-1-1        | MT006179  | Sri Lanka | 2018-3-26       |
| MN566111      | New Caledonia | 2018-4-9        | MT006165  | Sri Lanka | 2018-7-18       |
| MN566112      | New Caledonia | 2018-4-23       | MT006150  | Sri Lanka | 2017-11-16      |
| KF744398      | Philippines   | 2005-12-31      | MT006178  | Sri Lanka | 2018-3-15       |
| MG599599      | Taiwan        | 2001-5-10       | MT006160  | Sri Lanka | 2017-12-1       |
| MG599594      | Taiwan        | 2001-6-22       | MT006185  | Sri Lanka | 2018-4-3        |
| MG599596      | Taiwan        | 2001-6-22       | MT006145  | Sri Lanka | 2018-4-30       |
| DQ645542      | Taiwan        | 2001-11-12      | MT006184  | Sri Lanka | 2018-4-1        |
| MG599595      | Taiwan        | 2001-11-11      | MT006167  | Sri Lanka | 2017-12-21      |
| DQ645540      | Taiwan        | 2001-10-31      | MT006168  | Sri Lanka | 2018-1-3        |
| MG599592      | Taiwan        | 2001-11-1       | MT006172  | Sri Lanka | 2018-1-19       |
| DQ645543      | Taiwan        | 2001-12-3       | MT006164  | Sri Lanka | 2018-7-17       |
| MG599597      | Taiwan        | 2001-12-2       | MT006177  | Sri Lanka | 2018-3-14       |
| DQ645544      | Taiwan        | 2001-12-7       | MT006143  | Sri Lanka | 2018-4-25       |
| MG599598      | Taiwan        | 2001-12-6       | MT006149  | Sri Lanka | 2018-5-17       |
| DQ645541      | Taiwan        | 2001-11-3       | MW512471  | Singapore | 2017-1-1        |
| MG599593      | Taiwan        | 2001-7-3        | MH827550  | China     | 2017-12-31      |
| MG599600      | Taiwan        | 2001-8-11       | MN018354  | China     | 2017-5-23       |
| MG599601      | Taiwan        | 2001-11-13      | MW512419  | Singapore | 2014-1-1        |
| MG599606      | Taiwan        | 2001-12-24      | MW512472  | Singapore | 2017-1-1        |
| MG599610      | Taiwan        | 2002-1-10       | MW512454  | Singapore | 2016-1-1        |
| MG599617      | Taiwan        | 2002-1-7        | MW512473  | Singapore | 2017-1-1        |
| MG599603      | Taiwan        | 2002-1-7        | MK564480  | China     | 2016-8-26       |
| DQ645555      | Taiwan        | 2002-11-1       | MZ636803  | Thailand  | 2019-11-28      |
| MG599630      | Taiwan        | 2002-10-31      | MZ636805  | Thailand  | 2019-12-30      |
| MG599602      | Taiwan        | 2002-1-21       | MN923121  | China     | 2019-10-10      |
| MG599609      | Taiwan        | 2002-1-21       | MH827546  | China     | 2017-2-23       |
| MG599633      | Taiwan        | 2002-8-26       | MN018344  | China     | 2017-3-11       |
| MG599608      | Taiwan        | 2002-1-21       | MH110599  | China     | 2017-9-1        |
| MG599612      | Taiwan        | 2002-2-13       | OP684147  | China     | 2017-9-19       |
| MG599611      | Taiwan        | 2002-2-13       | OP684170  | China     | 2017-9-5        |
| MG599613      | Taiwan        | 2002-2-13       | OP684176  | China     | 2017-9-5        |
| DQ645551      | Taiwan        | 2002-9-12       | OP684163  | China     | 2017-8-29       |
| MG599628      | Taiwan        | 2002-12-31      | MW512492  | Singapore | 2019-4-10       |
| MG599619      | Taiwan        | 2002-5-15       | MN923118  | China     | 2019-8-14       |
| MG599607      | Taiwan        | 2002-4-2        | MW720955  | China     | 2019-9-1        |



| Accession no. | Location  | Collection date | Accession | Location  | Collection date |
|---------------|-----------|-----------------|-----------|-----------|-----------------|
| DQ645548      | Taiwan    | 2002-7-20       | OP684181  | China     | 2018-7-3        |
| DQ645545      | Taiwan    | 2002-6-17       | OQ653841  | China     | 2022-7-22       |
| MG599605      | Taiwan    | 2002-6-4        | OL435143  | Cambodia  | 2020-8-1        |
| MG599629      | Taiwan    | 2002-7-29       | MW295818  | China     | 2020-10-9       |
| DQ645552      | Taiwan    | 2002-9-13       | MW345921  | China     | 2020-10-18      |
| MG599615      | Taiwan    | 2002-3-27       | OL414747  | Cambodia  | 2019-8-1        |
| DQ645553      | Taiwan    | 2002-10-23      | ON887284  | Cambodia  | 2019-7-8        |
| MG599622      | Taiwan    | 2002-7-14       | OL412740  | Cambodia  | 2019-7-1        |
| MG599634      | Taiwan    | 2002-10-10      | OL414727  | Cambodia  | 2019-8-31       |
| DQ645546      | Taiwan    | 2002-6-24       | OL414730  | Cambodia  | 2019-7-1        |
| MG599618      | Taiwan    | 2002-6-12       | OL414742  | Cambodia  | 2019-6-1        |
| MG599626      | Taiwan    | 2002-12-31      | OL414740  | Cambodia  | 2019-6-1        |
| MG599620      | Taiwan    | 2002-8-17       | OL414738  | Cambodia  | 2019-6-1        |
| DQ645549      | Taiwan    | 2002-8-18       | OL414763  | Cambodia  | 2019-8-1        |
| MG599623      | Taiwan    | 2002-3-26       | OL414759  | Cambodia  | 2019-6-30       |
| MG599632      | Taiwan    | 2002-11-17      | OL414722  | Cambodia  | 2019-8-1        |
| DQ645556      | Taiwan    | 2002-11-18      | OL414725  | Cambodia  | 2019-8-31       |
| DQ645550      | Taiwan    | 2002-8-19       | OL414724  | Cambodia  | 2019-8-1        |
| MG599616      | Taiwan    | 2002-7-17       | OL414717  | Cambodia  | 2019-7-31       |
| DQ645547      | Taiwan    | 2002-7-16       | OL414718  | Cambodia  | 2019-7-26       |
| MT921572      | Australia | 2000-1-1        | OL414760  | Cambodia  | 2019-8-27       |
| FJ196853      | China     | 2003-1-1        | MW295816  | China     | 2020-8-7        |
| FJ196854      | China     | 1993-12-23      | OL414736  | Cambodia  | 2020-6-17       |
| KC964094      | China     | 1993-12-23      | OL414746  | Cambodia  | 2020-6-16       |
| JN851124      | Singapore | 2005-3-6        | OQ028217  | Vietnam   | 2019-6-7        |
| EU081179      | Singapore | 2005-9-5        | OQ028216  | Vietnam   | 2022-5-25       |
| EU081178      | Singapore | 2005-5-19       | OQ028225  | Vietnam   | 2020-9-23       |
| EU081177      | Singapore | 2005-10-22      | OL414764  | Cambodia  | 2020-8-1        |
| JN851125      | Singapore | 2005-3-31       | OQ678101  | Cambodia  | 2020-6-3        |
| JN851130      | Singapore | 2005-8-16       | OQ683881  | Cambodia  | 2020-6-2        |
| KC762674      | Indonesia | 2008-3-11       | OL414754  | Cambodia  | 2020-8-1        |
| KC762677      | Indonesia | 2008-2-15       | OQ678102  | Cambodia  | 2020-7-30       |
| KC762675      | Indonesia | 2008-3-8        | OL414749  | Cambodia  | 2020-6-5        |
| KU509270      |           | 2012-12-31      | OL414732  | Cambodia  | 2020-8-31       |
| MW512385      | Singapore | 2013-1-1        | OL414758  | Cambodia  | 2020-9-12       |
| MF004385      | France    | 2014-9-6        | OQ000263  | Cambodia  | 2020-9-12       |
| MW512384      | Singapore | 2013-1-1        | OL414733  | Cambodia  | 2020-8-1        |
| MK564477      | China     | 2016-4-15       | OL414756  | Cambodia  | 2020-8-31       |
| MW512479      | Singapore | 2018-12-31      | OL414731  | Cambodia  | 2020-9-12       |
| MW512450      | Singapore | 2016-4-23       | OP999336  | Cambodia  | 2020-9-12       |
| OP410992      | Singapore | 2016-10-1       | OL414753  | Cambodia  | 2020-8-1        |
| MH827527      | China     | 2017-1-1        | OL414765  | Cambodia  | 2020-8-1        |
| MN018352      | China     | 2015-9-7        | OL414752  | Cambodia  | 2020-7-29       |
| KU365901      | Taiwan    | 2015-1-1        | OL414755  | Cambodia  | 2020-8-25       |
| KU365902      | Taiwan    | 2015-3-18       | OL414757  | Cambodia  | 2020-9-11       |
| KU365903      | Taiwan    | 2015-5-14       | OP999339  | Cambodia  | 2020-9-11       |
| MW512480      | Singapore | 2018-12-31      | OL414751  | Cambodia  | 2020-7-14       |
| MW945435      | Vietnam   | 2006-12-31      | OL414750  | Cambodia  | 2020-7-14       |
| MH048673      | Malaysia  | 2014-12-6       | OP684196  | China     | 2019-1-5        |
| MH048675      | Malaysia  | 2014-12-7       | OP684151  | China     | 2017-9-26       |
| MF043956      | China     | 2016-1-1        | MH110564  | China     | 2017-9-13       |
| MW721475      | China     | 2010-10-9       | MH110572  | China     | 2017-9-13       |
| MW721474      | China     | 2010-10-9       | MW512482  | Singapore | 2018-1-1        |
| JX470186      | China     | 2010-12-31      | MW512494  | Singapore | 2019-1-1        |
| KP723479      | China     | 2010-11-21      | MW512481  | Singapore | 2018-4-5        |
| KC762679      | Indonesia | 2010-3-29       | OM639979  | India     | 2021-10-19      |
| KC762671      | Indonesia | 2008-2-19       | MK564485  | China     | 2018-8-28       |
| KC762672      | Indonesia | 2008-4-9        | MK783202  | China     | 2018-11-27      |
| ON907579      | China     | 2017-8-7        | MK783203  | China     | 2018-11-27      |
| MK564487      | China     | 2018-9-3        | MW512483  | Singapore | 2018-1-1        |
| MK783204      | China     | 2018-8-23       | MN923110  | China     | 2019-8-4        |
| MW721459      | China     | 2018-10-1       | MW720947  | China     | 2019-9-1        |
| ON887640      | China     | 2018-8-28       | MN923108  | China     | 2019-6-20       |
| ON908226      | China     | 2018-8-28       | ON908244  | China     | 2019-6-20       |
| MG189962      | Tanzania  | 2014-6-1        | MW720949  | China     | 2019-9-1        |
| MZ857213      | Tanzania  | 2014-6-30       | MW720946  | China     | 2019-9-20       |
| MZ857212      | Tanzania  | 2014-1-1        | MW720945  | China     | 2019-9-1        |
| MZ857214      | Tanzania  | 2014-12-12      | MN923119  | China     | 2019-8-21       |
| MZ857208      | Kenya     | 2013-12-30      | MW720950  | China     | 2019-9-1        |

| Accession no. | Location         | Collection date | Accession | Location  | Collection date |
|---------------|------------------|-----------------|-----------|-----------|-----------------|
| MZ857215      | Somalia          | 2015-1-1        | MW720957  | China     | 2019-9-17       |
| MZ857211      | Mozambique       | 2014-9-9        | MW720951  | China     | 2019-9-11       |
| MZ857210      | Tanzania         | 2014-9-9        | MW720954  | China     | 2019-9-11       |
| MK564478      | China            | 2016-4-22       | MW512476  | Singapore | 2017-1-1        |
| KT187555      | China            | 2014-1-7        | MW512474  | Singapore | 2017-1-1        |
| KT187553      | China            | 2014-7-15       | MW512488  | Singapore | 2018-6-2        |
| KP012546      | China            | 2014-12-31      | MW512497  | Singapore | 2019-1-1        |
| MW721465      | China            | 2014-10-1       | MW512486  | Singapore | 2018-10-2       |
| KT187557      | China            | 2014-12-23      | MW512498  | Singapore | 2019-1-1        |
| KP723478      | China            | 2014-12-31      | MW512487  | Singapore | 2018-12-31      |
| MW721473      | China            | 2014-10-1       | MH827554  | China     | 2017-6-13       |
| KT187556      | China            | 2014-5-2        | MN018360  | China     | 2017-7-2        |
| KT187558      | China            | 2014-7-24       | MK564481  | China     | 2017-7-27       |
| MW721468      | China            | 2014-10-18      | MW512484  | Singapore | 2018-1-1        |
| KX225486      | China            | 2015-1-1        | MW512485  | Singapore | 2018-8-8        |
| MW721463      | China            | 2014-10-28      | MW186239  | Singapore | 2019-10-1       |
| KX655787      | China            | 2015-1-1        | OP410990  | Singapore | 2019-10-31      |
| MW721464      | China            | 2014-10-29      | MK543448  | China     | 2018-9-23       |
| KT187554      | China            | 2014-11-3       | MK543479  | China     | 2018-9-23       |
| MW721466      | China            | 2014-10-31      | MK543471  | China     | 2018-9-23       |
| MW721467      | China            | 2014-10-1       | MK543449  | China     | 2018-9-26       |
| KX655786      | China            | 2015-1-1        | OP811980  | Pakistan  | 2022-4-28       |
| MW721462      | China            | 2014-10-31      | OP811983  | Pakistan  | 2022-9-28       |
| JN851128      | Singapore        | 2006-3-2        | OP811981  | Pakistan  | 2022-10-18      |
| KC762658      | Indonesia        | 2007-8-14       | OP811982  | Pakistan  | 2022-9-13       |
| MT921573      | Australia        | 2004-1-1        | OP898559  | Pakistan  | 2022-10-1       |
| KC762665      | Indonesia        | 2007-7-6        | OP811984  | Pakistan  | 2022-9-30       |
| KC762678      | Indonesia        | 2010-3-4        | OP811978  | Pakistan  | 2022-4-27       |
| KC762664      | Indonesia        | 2008-3-28       | OP811977  | Pakistan  | 2022-4-27       |
| MW512414      | Singapore        | 2014-12-31      | OP811979  | Pakistan  | 2022-4-28       |
| KY794785      | Papua New Guinea | 2010-5-11       | MW512475  | Singapore | 2017-1-1        |
| MT921570      | Australia        | 2013-1-1        | MH110565  | China     | 2017-9-1        |
| KU517845      | Papua New Guinea | 2013-4-23       | MH110566  | China     | 2017-9-1        |
| OL321183      | Papua New Guinea | 2016-3-12       | MH110576  | China     | 2017-8-1        |
| OL321186      | Papua New Guinea | 2016-4-12       | MH110597  | China     | 2017-9-1        |
| OL321176      | Papua New Guinea | 2016-1-1        | OP684156  | China     | 2017-8-22       |
| MH985858      | Australia        | 2016-1-1        | OP684172  | China     | 2017-9-6        |
| OP684198      | China            | 2019-1-20       | OP684144  | China     | 2017-9-18       |
| OL321182      | Papua New Guinea | 2016-3-5        | OP684148  | China     | 2017-9-21       |
| OL321184      | Papua New Guinea | 2016-5-10       | OP684179  | China     | 2017-9-12       |
| OL321178      | Papua New Guinea | 2016-3-7        | OP684146  | China     | 2017-9-23       |
| OL321185      | Papua New Guinea | 2016-4-21       | OP684178  | China     | 2017-9-11       |
| MT921571      | Papua New Guinea | 2015-12-16      | OP684145  | China     | 2017-9-20       |
| MN018363      | China            | 2016-2-23       | OP684149  | China     | 2017-9-26       |
| OL321177      | Papua New Guinea | 2016-3-28       | OP684175  | China     | 2017-9-5        |
| KC762657      | Indonesia        | 2008-4-23       | OP684177  | China     | 2017-9-7        |
| KC762659      | Indonesia        | 2008-4-15       | OP684171  | China     | 2017-8-24       |
| KX452015      | Malaysia         | 2014-1-31       | MH110594  | China     | 2017-8-1        |
| KM279604      | Singapore        | 2008-4-19       | MH110598  | China     | 2017-9-1        |
| MW512356      | Singapore        | 2009-7-18       | MH110579  | China     | 2017-8-17       |
| KU509272      | Thailand         | 2009-12-31      | MH110580  | China     | 2017-8-31       |
| KM279605      | Singapore        | 2009-1-1        | OP684165  | China     | 2017-9-1        |
| MW512361      | Singapore        | 2010-12-31      | OP684168  | China     | 2017-9-3        |
| KM279606      | Singapore        | 2010-7-6        | OP684158  | China     | 2017-8-29       |
| MW512359      | Singapore        | 2010-12-3       | OP684164  | China     | 2017-8-29       |
| JN851113      | Singapore        | 2006-11-7       | OP684157  | China     | 2017-8-30       |
| OP684167      | China            | 2017-9-2        | MH110590  | China     | 2017-9-30       |
